# Supplementary material for: Association between Helicobacter pylori Infection and the types of Tumor Markers among Yemeni Gastric Cancer Patients: A Case-Control Study
Source: Research Square preprint supplement (doi:10.21203/rs.3.rs-6180249/v1), 2025-04-22
Supplement: Supplementary file 1 [file 0fa9eaf78b519356ce1d464c.pdf]

**Demographic, Lifestyle, and Clinical Data Questionnaire for Gastric Cancer and  
Helicobacter pylori Infection Among Yemeni Patients**

*(For Research Purposes – Confidential)*

**Section A: Participant Information**

1. **Participant ID:** \_\_\_\_\_
2. **Date of Interview:**    /    / \_\_\_\_\_
3. **Interviewer's Name:** \_\_\_\_\_
4. **Informed Consent Obtained:**  
☐ Yes  
☐ No (Discontinue participation)

**Section B: Demographic Characteristics**

5. **Age (in years):** \_\_\_\_\_
6. **Gender:**  
☐ Male  
☐ Female
7. **Socioeconomic Status (Based on Income and Occupation)** *(Select one)*  
☐ Low (Unemployed, informal work, or low-income occupation)  
☐ Moderate (Stable employment with moderate income)  
☐ High (Professionals, business owners, or high-income individuals)
8. **Educational Level:** *(Select the highest level completed)*  
☐ No formal education (Illiterate)  
☐ Primary education (Up to 5th grade)  
☐ Secondary education (Up to 12th grade)  
☐ Higher education (University degree or above)

**Section C: Lifestyle and Risk Factors**

9. **Current Smoking Status:**  
☐ Smoker  
☐ Non-Smoker  
☐ Former Smoker (Quit \_\_\_\_ years ago)
10. **If currently smoking, how many cigarettes per day?**  
☐ Less than 5  
☐ 5-10

- ☐ 11-20  
☐ More than 20

**11. Do you live in a crowded home (more than 4 people per room)?**

- ☐ Yes  
☐ No

**12. Handwashing habits before eating:**

- ☐ Always  
☐ Sometimes  
☐ Rarely  
☐ Never

**13. Do you frequently consume food from restaurants or street vendors?**

- ☐ Yes  
☐ No

#### **Section D: Dietary Habits**

**14. Frequency of food consumption:** *(Mark the appropriate box for each category)*

| <b>Food Item</b>         | <b>Daily</b>             | <b>2-3 times/week</b>    | <b>Occasionally</b>      | <b>Never</b>             |
|--------------------------|--------------------------|--------------------------|--------------------------|--------------------------|
| Fresh Fruits             | <input type="checkbox"/> | <input type="checkbox"/> | <input type="checkbox"/> | <input type="checkbox"/> |
| Fresh Vegetables         | <input type="checkbox"/> | <input type="checkbox"/> | <input type="checkbox"/> | <input type="checkbox"/> |
| Processed or Smoked Meat | <input type="checkbox"/> | <input type="checkbox"/> | <input type="checkbox"/> | <input type="checkbox"/> |
| Salty and Preserved Food | <input type="checkbox"/> | <input type="checkbox"/> | <input type="checkbox"/> | <input type="checkbox"/> |
| Dairy Products           | <input type="checkbox"/> | <input type="checkbox"/> | <input type="checkbox"/> | <input type="checkbox"/> |
| Alcohol                  | <input type="checkbox"/> | <input type="checkbox"/> | <input type="checkbox"/> | <input type="checkbox"/> |

#### **Section E: Helicobacter pylori Infection History**

**15. Have you ever been diagnosed with H. pylori infection?**

- ☐ Yes  
☐ No  
☐ Not Sure

**16. Has anyone in your immediate family been diagnosed with H. pylori infection?**

- ☐ Yes  
☐ No

## **Section F: Family History of Gastric Cancer**

**17. Has any immediate family member (parent, sibling, child) been diagnosed with gastric cancer?**

☐ Yes

☐ No

**18. If yes, which family member(s)?** *(Select all that apply)*

☐ Father

☐ Mother

☐ Sibling(s)

☐ Child(ren)

☐ Other: \_\_\_\_\_

**19. At what age was the family member diagnosed?**

☐ Before 40 years

☐ 40-60 years

☐ After 60 years
